# Supplementary material for: Antagonist actions of CMK-1/CaMKI and TAX-6/calcineurin along the C. elegans thermal avoidance circuit orchestrate adaptation of nociceptive response to repeated stimuli
Source: eLife. 2025 Apr 30;14:RP103497. doi: 10.7554/eLife.103497 (PMC12043318; doi:10.7554/eLife.103497)
Supplement: Figure 2—figure supplement 1—source data 1. [file elife-103497-fig2-figsupp1-data1.xlsx]

## Sheet: Figure 2 Supp1
pot-hoc tests				p= 0.187					p < .001					p < .001
replicates		n=12		n=12			n=12		n=12			n=12		n=12
time		T0		T0			T10		T10			T30		T30
	N2	69.2708	T179D	73.2218		N2	80.3922	T179D	41.6		N2	75.9615	T179D	51.1111
	N2	84.0909	T179D	60.1594		N2	86.1111	T179D	64.557		N2	69.863	T179D	43.0605
	N2	84.0909	T179D	84.2105		N2	76.7123	T179D	66.6667		N2	77.551	T179D	34.5679
	N2	83.1081	T179D	75.2101		N2	90.604	T179D	86.0215		N2	91.6667	T179D	40
	N2	83.9286	T179D	76.8519		N2	93.8776	T179D	70.7627		N2	89.1892	T179D	33.5878
	N2	85.8974	T179D	80.8989		N2	94.5455	T179D	62.8571		N2	87.5	T179D	50
	N2	65.0558	T179D	87.3333		N2	76.7327	T179D	66.6667		N2	63.1148	T179D	29.4118
	N2	72.6496	T179D	63.6364		N2	54.4118	T179D	40.9091		N2	50.3448	T179D	17.0732
	N2	69.3966	T179D	53.2468		N2	70.8571	T179D	55.5556		N2	40.625	T179D	17.7778
	N2	75	T179D	81.8182		N2	85.0932	T179D	72.093		N2	77.4194	T179D	35.4839
	N2	83.8028	T179D	74.2424		N2	86.5854	T179D	61.5385		N2	46.1538	T179D	27.2727
	N2	85.0932	T179D	70.5882		N2	86.3248	T179D	33.3333		N2	55.8442	T179D	12.9032
