# Supplementary material for: Antagonist actions of CMK-1/CaMKI and TAX-6/calcineurin along the C. elegans thermal avoidance circuit orchestrate adaptation of nociceptive response to repeated stimuli
Source: eLife. 2025 Apr 30;14:RP103497. doi: 10.7554/eLife.103497 (PMC12043318; doi:10.7554/eLife.103497)
Supplement: Figure 2—source data 1. [file elife-103497-fig2-data1.xlsx]

## Sheet: Figure 2a
pot-hoc tests					p=0.134			p= 0.079							p < .001			p= 0.145
replicates		n=178			n=106			n=24				n=178			n=106			n=12
time		T0			T0			T0				T60			T60			T60
	N2	72.4265		ok287	90.991		T179D	88.125			N2	14.4578		ok287	75.4902		T179D	41.2587
	N2	71.4912		ok287	69.7183		T179D	75			N2	36.4583		ok287	68.6869		T179D	39.2857
	N2	73.399		ok287	86.3636		T179D	74.4565			N2	20.2381		ok287	80.531		T179D	25.8427
	N2	72.2892		ok287	81.6667		T179D	70.4545			N2	12.963		ok287	88.6179		T179D	37.5
	N2	75.3846		ok287	76.0684		T179D	82.5			N2	42.2414		ok287	85		T179D	47.6744
	N2	79.602		ok287	80.7229		T179D	73.5294			N2	16.6667		ok287	79.1045		T179D	33.7079
	N2	75.8865		ok287	83.1081		T179D	60.7759			N2	40.1869		ok287	72.4138		T179D	36.1345
	N2	81.4516		ok287	89.1089		T179D	43.75			N2	34.3284		ok287	64.4068		T179D	31.5789
	N2	83.871		ok287	85.9259		T179D	74.5946			N2	47.619		ok287	51.7241		T179D	32.6087
	N2	95.3271		ok287	87		T179D	58.5859			N2	56.1644		ok287	86.0215		T179D	24.7312
	N2	85.0746		ok287	82.9932		T179D	50.8475			N2	88		ok287	69.5652		T179D	32.2581
	N2	76.7241		ok287	76.1364		T179D	69.6335			N2	74.6479		ok287	76.3889		T179D	35.0962
	N2	75.5319		ok287	75.8865		T179D	69.2708			N2	36		ok287	82.8947
	N2	82.9545		ok287	71		T179D	84.0909			N2	60		ok287	72.4138
	N2	75		ok287	68.9189		T179D	84.0909			N2	29.4118		ok287	77.551
	N2	84.127		ok287	76.9231		T179D	83.1081			N2	64.0693		ok287	81.9444
	N2	81.9672		ok287	83.2		T179D	83.9286			N2	79.4872		ok287	76.4706
	N2	85.7143		ok287	72.3077		T179D	85.8974			N2	56.8182		ok287	75
	N2	85.0575		ok287	81.5385		T179D	65.0558			N2	22.6804		ok287	80.4878
	N2	88.3495		ok287	83.871		T179D	72.6496			N2	81.25		ok287	80
	N2	80		ok287	82.4742		T179D	69.3966			N2	44.3038		ok287	77.193
	N2	70.1389		ok287	84.6939		T179D	75			N2	42.1053		ok287	78.2609
	N2	75		ok287	81.4607		T179D	83.8028			N2	30.5344		ok287	70.4545
	N2	85		ok287	74.5803		T179D	85.0932			N2	41.0256		ok287	80.1105
	N2	87.3563		ok287	80.826						N2	25.6757		ok287	83.1579
	N2	78.5185		ok287	76.0391						N2	28.2353		ok287	84.058
	N2	82.659		ok287	89.9371						N2	27.8689		ok287	94.8276
	N2	74.5098		ok287	83.8462						N2	51.5152		ok287	86.4198
	N2	73.8854		ok287	89.6825						N2	51.5152		ok287	88.5246
	N2	87.9121		ok287	88						N2	61.9048		ok287	79.0323
	N2	82.6531		ok287	80.1325						N2	32.3944		ok287	84.9315
	N2	88.8889		ok287	82.7778						N2	39.6552		ok287	82.0513
	N2	79.3814		ok287	82.7957						N2	23.5294		ok287	81.0811
	N2	80.9524		ok287	57.7982						N2	58.0357		ok287	40.9091
	N2	73.1844		ok287	84.1202						N2	74.0506		ok287	81.25
	N2	74.0566		ok287	81.295						N2	43.2		ok287	82
	N2	78.1955		ok287	89.1892						N2	60.3053		ok287	91.6667
	N2	66.9782		ok287	74.7126						N2	68.9655		ok287	88.0435
	N2	83.3333		ok287	81.3187						N2	67.3171		ok287	91.8367
	N2	66.4286		ok287	76.8844						N2	31.6456		ok287	66.6667
	N2	83.8235		ok287	75.7009						N2	29.6296		ok287	76.9231
	N2	84.4687		ok287	79.8883						N2	59.6273		ok287	88.7097
	N2	86.4734		ok287	79.602						N2	61.6667		ok287	87.3684
	N2	82.4561		ok287	76.8392						N2	79.661		ok287	76.5957
	N2	83.8816		ok287	76.3473						N2	81.1224		ok287	83.5366
	N2	76.9737		ok287	78.0392						N2	44.3609		ok287	86.6667
	N2	83.7563		ok287	68.75						N2	45.122		ok287	86.7647
	N2	77.512		ok287	65.8915						N2	37.7778		ok287	76.4706
	N2	79.5918		ok287	88.3978						N2	33.871		ok287	80.3419
	N2	85.1852		ok287	87.1324						N2	37.6147		ok287	81.3953
	N2	86.3095		ok287	80.7547						N2	52		ok287	80.8411
	N2	78.3898		ok287	77.4648						N2	20		ok287	73.1707
	N2	73.3083		ok287	95.6897						N2	12.3077		ok287	95.1613
	N2	63.142		ok287	82.5175						N2	32.4675		ok287	73.494
	N2	78.4232		ok287	74.6914						N2	43.3121		ok287	80.3738
	N2	44.7489		ok287	76.6839						N2	24.2857		ok287	76.1468
	N2	80.1282		ok287	78.9474						N2	57.0552		ok287	89.6552
	N2	66.6667		ok287	45.9574						N2	12.3894		ok287	90.6542
	N2	54.4118		ok287	59.3103						N2	25.9259		ok287	91.3043
	N2	80.7018		ok287	42.5287						N2	18.9474		ok287	94.4444
	N2	60.3774		ok287	40.5797						N2	53.7313		ok287	87.2483
	N2	81.1429		ok287	85.7143						N2	51.4286		ok287	86.3636
	N2	61.4286		ok287	87.0968						N2	35.1064		ok287	94.1176
	N2	74.6479		ok287	87.2727						N2	25.8621		ok287	95.3488
	N2	69.6721		ok287	52						N2	25		ok287	69.4444
	N2	85.9375		ok287	63.0573						N2	59.5041		ok287	87.931
	N2	72.0238		ok287	67.8571						N2	38.6364		ok287	95.6522
	N2	71.4286		ok287	75.3968						N2	37.8151		ok287	88
	N2	68.8976		ok287	63.8298						N2	30.4348		ok287	90
	N2	78.4431		ok287	81.2903						N2	54.5455		ok287	85
	N2	86.4583		ok287	79.2453						N2	50.5618		ok287	80.2326
	N2	73.3728		ok287	68.5714						N2	80.916		ok287	84.6154
	N2	71.2766		ok287	92.7928						N2	57.8947		ok287	74.1935
	N2	78.0822		ok287	77.8523						N2	43.5484		ok287	89.3617
	N2	64.9351		ok287	80.3109						N2	59.1837		ok287	79.5918
	N2	74.4318		ok287	92.7835						N2	46.3768		ok287	86.9565
	N2	68.6957		ok287	89.0351						N2	69.1176		ok287	88.3333
	N2	77.3109		ok287	91.7241						N2	29.078		ok287	82.7586
	N2	83.5766		ok287	86.3905						N2	33.0144		ok287	77.8302
	N2	75.1381		ok287	75.6614						N2	59.375		ok287	80.4348
	N2	73.494		ok287	82.8729						N2	33.6364		ok287	89.7727
	N2	83.0189		ok287	73.716						N2	34.4828		ok287	87.1429
	N2	71.0317		ok287	78.1726						N2	56.044		ok287	88.4615
	N2	75		ok287	84.3373						N2	29.5597		ok287	71.7949
	N2	91.8919		ok287	72.3247						N2	41.3333		ok287	73.7705
	N2	72.2628		ok287	83.5878						N2	41.5663		ok287	83.7838
	N2	82.2917		ok287	76.2082						N2	14.5985		ok287	74.4444
	N2	75		ok287	86.9792						N2	32.6087		ok287	80.1887
	N2	87.963		ok287	73.3668						N2	35.9375		ok287	88
	N2	88.3978		ok287	68.4564						N2	22.3881		ok287	84.466
	N2	77.4011		ok287	85.0847						N2	26.1364		ok287	88.7417
	N2	72.093		ok287	84.5771						N2	26.1745		ok287	88.75
	N2	78.022		ok287	80.0797						N2	72.4138		ok287	80.6122
	N2	83.5897		ok287	81.2308						N2	81.1688		ok287	70.1754
	N2	52.6316		ok287	81.3291						N2	92.7083		ok287	72.4771
	N2	70.9434		ok287	74.5098						N2	31.5385		ok287	90.7143
	N2	83.8028		ok287	88.5057						N2	44.2623		ok287	85.7143
	N2	84.3537		ok287	72.0588						N2	50.6173		ok287	87.037
	N2	73.75		ok287	65.625						N2	43.2692		ok287	89.5522
	N2	82.1918		ok287	78.75						N2	50		ok287	80.303
	N2	71.2389		ok287	84.8684						N2	54.717		ok287	37.1795
	N2	75.2381		ok287	76.1468						N2	57.8512		ok287	24.2424
	N2	83.8028		ok287	79.3478						N2	29.5455		ok287	33.8028
	N2	71.118		ok287	78.9855						N2	18.0851		ok287	84.2857
	N2	75.8772		ok287	76.1062						N2	35.6589		ok287	83.3333
	N2	80.8219		ok287	80						N2	26.7442		ok287	81.3187
	N2	86.5854									N2	31.0924
	N2	77.6271									N2	24.2604
	N2	73.913									N2	36.4286
	N2	73.4463									N2	37.9845
	N2	80.4878									N2	48.5149
	N2	73.8532									N2	55
	N2	76.1006									N2	53.8462
	N2	80.4233									N2	55.3571
	N2	75.5952									N2	16.6667
	N2	68.6667									N2	37.7193
	N2	75.1412									N2	29.4737
	N2	68.1452									N2	18.4466
	N2	88.4211									N2	43.6548
	N2	76.5714									N2	41.4286
	N2	83.3333									N2	16.6667
	N2	86.4198									N2	66.6667
	N2	58.2278									N2	50.5495
	N2	65.6863									N2	36.25
	N2	74.1935									N2	42.5532
	N2	76.6129									N2	63.0137
	N2	78.3784									N2	40.2778
	N2	66.9291									N2	20.6897
	N2	72.6415									N2	31.7757
	N2	69.9029									N2	19.2
	N2	77.2414									N2	48.9933
	N2	84.7458									N2	78.4946
	N2	79.8165									N2	60.8696
	N2	78.1609									N2	49.4382
	N2	80									N2	52.9412
	N2	83.3333									N2	36.2319
	N2	76.9231									N2	47.8261
	N2	80									N2	82.1782
	N2	78.5714									N2	54.0541
	N2	70.8333									N2	56.1538
	N2	62.2857									N2	46.0317
	N2	78.8321									N2	62.8571
	N2	86.1789									N2	47.2527
	N2	86.0656									N2	40.7767
	N2	63.6364									N2	33.3333
	N2	83.3333									N2	38.5714
	N2	68.0365									N2	80.8824
	N2	78.3626									N2	26.0606
	N2	67.9487									N2	41.5584
	N2	53.9062									N2	21.8978
	N2	84.9558									N2	29.4118
	N2	84.7059									N2	21.9048
	N2	75.2212									N2	42.8571
	N2	81.1111									N2	20
	N2	74.8252									N2	34.188
	N2	73.3645									N2	22.5564
	N2	71.6667									N2	20.9424
	N2	68.2927									N2	22.3404
	N2	69.1667									N2	29.3103
	N2	86.9565									N2	12.5
	N2	80.4348									N2	53.1915
	N2	62.6263									N2	44.697
	N2	79.0909									N2	22.8571
	N2	86.4583									N2	28.1609
	N2	75.8621									N2	47.5728
	N2	77.3438									N2	23.6842
	N2	83.2432									N2	20.3125
	N2	80.8989									N2	63.7681
	N2	77.027									N2	57.9545
	N2	90.9091									N2	38.8489
	N2	63.253									N2	56.4516
	N2	63.5193									N2	33.8129
	N2	69.1358									N2	26.9841
	N2	80.5085									N2	21.2121
	N2	66.6667									N2	21.2121
	N2	76.3158									N2	56.9444
	N2	77.3196									N2	59.0909
	N2	75.3333									N2	40.9091

## Sheet: Figure 2b
pot-hoc tests					p= 0.495							p < .001
replicates		n=27			n=27				n=27			n=27
		N2			N2				N2			N2
time		T0			T0				T60			T60
	CyA -	82.1138		CyA+	68.9189			CyA -	18.1818		CyA+	71.6535
	CyA -	78.4314		CyA+	74.8503			CyA -	13.9241		CyA+	59.4203
	CyA -	69.1275		CyA+	79.1045			CyA -	25		CyA+	74.8387
	CyA -	77.5401		CyA+	78.534			CyA -	23.7288		CyA+	84.4037
	CyA -	78.8845		CyA+	83.1325			CyA -	21.6418		CyA+	72.4138
	CyA -	72.7273		CyA+	78.8945			CyA -	42.1053		CyA+	80
	CyA -	79.0698		CyA+	79.2			CyA -	29.7872		CyA+	86.2069
	CyA -	81.8713		CyA+	88.6598			CyA -	24.8826		CyA+	35.3659
	CyA -	75		CyA+	83.8983			CyA -	51.9231		CyA+	66.9291
	CyA -	84		CyA+	69.3878			CyA -	13.2231		CyA+	64.5833
	CyA -	76.2887		CyA+	64.375			CyA -	10.8434		CyA+	75.2941
	CyA -	77.7778		CyA+	81.1688			CyA -	48.2993		CyA+	79.3478
	CyA -	87.0968		CyA+	83.0508			CyA -	28.9474		CyA+	61.1765
	CyA -	77.9762		CyA+	85.3107			CyA -	14.8571		CyA+	61.0526
	CyA -	80.1242		CyA+	78.9157			CyA -	28.2828		CyA+	30.6122
	CyA -	77		CyA+	86.2069			CyA -	16.7883		CyA+	74.2857
	CyA -	76.9231		CyA+	76.6129			CyA -	17.2222		CyA+	52.459
	CyA -	79.1908		CyA+	79.8658			CyA -	47.541		CyA+	58.8957
	CyA -	73.5099		CyA+	88.0597			CyA -	56.7568		CyA+	57.0312
	CyA -	71.7742		CyA+	81			CyA -	54.0741		CyA+	77.1654
	CyA -	84.3137		CyA+	65.8333			CyA -	70.5036		CyA+	69.6133
	CyA -	69.0821		CyA+	88.6076			CyA -	33.3333		CyA+	35.5372
	CyA -	78.2609		CyA+	75.5319			CyA -	43.299		CyA+	74.8201
	CyA -	85.2941		CyA+	84.7222			CyA -	71.2871		CyA+	85.0932
	CyA -	77.2277		CyA+	81.457			CyA -	38.2716		CyA+	34.6774
	CyA -	74.5562		CyA+	70			CyA -	54.4828		CyA+	63.2124
	CyA -	85.8447		CyA+	85.3147			CyA -	50.3106		CyA+	69.9346

## Sheet: Figure 2c
pot-hoc tests					p < .001							p < .001
replicates		n=21			n=21				n=21			n=21
time		T0			T0				T60			T60
	N2	68.2927		jh107	79.085			N2	29.3103		jh107	92.1875
	N2	69.1667		jh107	61.6162			N2	12.5		jh107	90.6977
	N2	86.9565		jh107	82.3009			N2	53.1915		jh107	91.2281
	N2	80.4348		jh107	82.1918			N2	44.697		jh107	62.6126
	N2	62.6263		jh107	89.9083			N2	22.8571		jh107	69.2308
	N2	79.0909		jh107	87.1508			N2	28.1609		jh107	77.2908
	N2	86.4583		jh107	82.6772			N2	47.5728		jh107	89.7959
	N2	75.8621		jh107	82.4268			N2	23.6842		jh107	78.7879
	N2	77.3438		jh107	78.5185			N2	20.3125		jh107	81.25
	N2	83.2432		jh107	84.9624			N2	63.7681		jh107	80.8696
	N2	80.8989		jh107	82.3529			N2	57.9545		jh107	76.9697
	N2	77.027		jh107	88.3495			N2	38.8489		jh107	81.6514
	N2	90.9091		jh107	83.4532			N2	56.4516		jh107	73.4463
	N2	63.253		jh107	89.6739			N2	33.8129		jh107	74.0157
	N2	63.5193		jh107	84.7926			N2	26.9841		jh107	78.9855
	N2	69.1358		jh107	88.2812			N2	21.2121		jh107	67.6056
	N2	80.5085		jh107	86.5031			N2	21.2121		jh107	78.022
	N2	66.6667		jh107	83.8235			N2	56.9444		jh107	80
	N2	76.3158		jh107	91.4729			N2	64.0625		jh107	79.4118
	N2	77.3196		jh107	97.3214			N2	59.0909		jh107	73.7705
	N2	75.3333		jh107	85.5556			N2	40.9091		jh107	86.3636
