# Supplementary material for: Antagonist actions of CMK-1/CaMKI and TAX-6/calcineurin along the C. elegans thermal avoidance circuit orchestrate adaptation of nociceptive response to repeated stimuli
Source: eLife. 2025 Apr 30;14:RP103497. doi: 10.7554/eLife.103497 (PMC12043318; doi:10.7554/eLife.103497)
Supplement: Figure 3—source data 1. [file elife-103497-fig3-data1.xlsx]

## Sheet: Figure 3a
pot-hoc tests					< .001			0.495			0.252							< .001			< .001			0.771
replicates		n=27			n=15			n=27			n=15				n=27			n=15			n=27			n=15
time		T0			T0			T0			T0				T60			T60			T60			T60
	N2CycA-	82.1138		ok287CycA-	88.3721		N2CycA+	68.9189		ok287CycA+	72.2892			N2CycA-	18.1818		N2CycA+	71.6535		ok287CycA-	84.7682		ok287CycA+	12.8834
	N2CycA-	78.4314		ok287CycA-	84.472		N2CycA+	74.8503		ok287CycA+	70.9497			N2CycA-	13.9241		N2CycA+	59.4203		ok287CycA-	83.9161		ok287CycA+	19.7605
	N2CycA-	69.1275		ok287CycA-	77.1186		N2CycA+	79.1045		ok287CycA+	77.9762			N2CycA-	25		N2CycA+	74.8387		ok287CycA-	74.7573		ok287CycA+	10.7595
	N2CycA-	77.5401		ok287CycA-	87.0588		N2CycA+	78.534		ok287CycA+	82.5175			N2CycA-	23.7288		N2CycA+	84.4037		ok287CycA-	91.8919		ok287CycA+	38.5714
	N2CycA-	78.8845		ok287CycA-	93.8462		N2CycA+	83.1325		ok287CycA+	67.2727			N2CycA-	21.6418		N2CycA+	72.4138		ok287CycA-	74.0385		ok287CycA+	21.8009
	N2CycA-	72.7273		ok287CycA-	87.6404		N2CycA+	78.8945		ok287CycA+	83.4711			N2CycA-	42.1053		N2CycA+	80		ok287CycA-	78.75		ok287CycA+	54.0541
	N2CycA-	79.0698		ok287CycA-	70.4225		N2CycA+	79.2		ok287CycA+	79.3651			N2CycA-	29.7872		N2CycA+	86.2069		ok287CycA-	87.037		ok287CycA+	60.2484
	N2CycA-	81.8713		ok287CycA-	82.6087		N2CycA+	88.6598		ok287CycA+	71.028			N2CycA-	24.8826		N2CycA+	35.3659		ok287CycA-	85.8896		ok287CycA+	40
	N2CycA-	75		ok287CycA-	87.1795		N2CycA+	83.8983		ok287CycA+	84.0426			N2CycA-	51.9231		N2CycA+	66.9291		ok287CycA-	87.2881		ok287CycA+	21.4953
	N2CycA-	84		ok287CycA-	84.9711		N2CycA+	69.3878		ok287CycA+	59.8131			N2CycA-	13.2231		N2CycA+	64.5833		ok287CycA-	84		ok287CycA+	30
	N2CycA-	76.2887		ok287CycA-	82.2727		N2CycA+	64.375		ok287CycA+	85.7143			N2CycA-	10.8434		N2CycA+	75.2941		ok287CycA-	83.9744		ok287CycA+	35.6164
	N2CycA-	77.7778		ok287CycA-	90.0621		N2CycA+	81.1688		ok287CycA+	63.4409			N2CycA-	48.2993		N2CycA+	79.3478		ok287CycA-	84.2857		ok287CycA+	24.3243
	N2CycA-	87.0968		ok287CycA-	85.9779		N2CycA+	83.0508		ok287CycA+	85.8696			N2CycA-	28.9474		N2CycA+	61.1765		ok287CycA-	91.7526		ok287CycA+	64.3836
	N2CycA-	77.9762		ok287CycA-	86.5922		N2CycA+	85.3107		ok287CycA+	77.2727			N2CycA-	14.8571		N2CycA+	61.0526		ok287CycA-	85.6		ok287CycA+	37.037
	N2CycA-	80.1242		ok287CycA-	84.375		N2CycA+	78.9157		ok287CycA+	77.2152			N2CycA-	28.2828		N2CycA+	30.6122		ok287CycA-	78.5714		ok287CycA+	32.0755
	N2CycA-	77					N2CycA+	86.2069						N2CycA-	16.7883		N2CycA+	74.2857
	N2CycA-	76.9231					N2CycA+	76.6129						N2CycA-	17.2222		N2CycA+	52.459
	N2CycA-	79.1908					N2CycA+	79.8658						N2CycA-	47.541		N2CycA+	58.8957
	N2CycA-	73.5099					N2CycA+	88.0597						N2CycA-	56.7568		N2CycA+	57.0312
	N2CycA-	71.7742					N2CycA+	81						N2CycA-	54.0741		N2CycA+	77.1654
	N2CycA-	84.3137					N2CycA+	65.8333						N2CycA-	70.5036		N2CycA+	69.6133
	N2CycA-	69.0821					N2CycA+	88.6076						N2CycA-	33.3333		N2CycA+	35.5372
	N2CycA-	78.2609					N2CycA+	75.5319						N2CycA-	43.299		N2CycA+	74.8201
	N2CycA-	85.2941					N2CycA+	84.7222						N2CycA-	71.2871		N2CycA+	85.0932
	N2CycA-	77.2277					N2CycA+	81.457						N2CycA-	38.2716		N2CycA+	34.6774
	N2CycA-	74.5562					N2CycA+	70						N2CycA-	54.4828		N2CycA+	63.2124
	N2CycA-	85.8447					N2CycA+	85.3147						N2CycA-	50.3106		N2CycA+	69.9346

## Sheet: Figure 3b
pot-hoc tests					0.285			0.005			< .001							0.018			< .001			< .001
replicates		n= 24			n=15			n= 21			n=15				n= 24			n=15			n= 21			n=15
time		T0			T0			T0			T0				T60			T60			T60			T60
	N2	68.5185		T197D	77.665		j107	95.8333		T197D;j107	89.1403			N2	37.2093		T197D	16.1435		j107	77.7778		T197D;j107	58.8571
	N2	80.4878		T197D	78.2609		j107	95.4545		T197D;j107	93.1429			N2	45.7143		T197D	49.697		j107	92.8571		T197D;j107	78.5714
	N2	68.9655		T197D	79.0323		j107	94.1176		T197D;j107	89.3939			N2	39.2857		T197D	28.4091		j107	91.3043		T197D;j107	62.3853
	N2	83.2298		T197D	73.1343		j107	84.7291		T197D;j107	84.9162			N2	64.1026		T197D	32.9545		j107	63.9344		T197D;j107	70.2703
	N2	82.0513		T197D	73.1183		j107	89.1026		T197D;j107	83.3333			N2	93.5484		T197D	35.8696		j107	73.9583		T197D;j107	70.6422
	N2	89.899		T197D	75.7202		j107	84.8837		T197D;j107	80.6452			N2	58.0645		T197D	23.5955		j107	74.5342		T197D;j107	63.8462
	N2	70.1613		T197D	74.1007		j107	86.014		T197D;j107	89.1447			N2	15.4362		T197D	34.2857		j107	87.8378		T197D;j107	92.2078
	N2	60.6557		T197D	78.626		j107	86.0294		T197D;j107	93.0818			N2	29.6804		T197D	29.8701		j107	73.913		T197D;j107	96.875
	N2	72.6027		T197D	83.6842		j107	86.8966		T197D;j107	90.8297			N2	30.5556		T197D	20.4301		j107	78.169		T197D;j107	88.3562
	N2	77.1429		T197D	81.0127		j107	76.25		T197D;j107	89.5			N2	46.9697		T197D	10.6195		j107	64.1026		T197D;j107	86.9091
	N2	77.3256		T197D	74.7826		j107	86.9159		T197D;j107	84.456			N2	73.8462		T197D	23.7931		j107	76.8116		T197D;j107	85.5596
	N2	87.8205		T197D	86.5672		j107	83.8462		T197D;j107	94.2177			N2	63.0252		T197D	17.8082		j107	54.7619		T197D;j107	90.991
	N2	62.9371		T197D	93.4579		j107	81.5217		T197D;j107	86.3158			N2	28.8462		T197D	23.5632		j107	51.25		T197D;j107	87.6289
	N2	83.2461		T197D	87.1429		j107	85.09		T197D;j107	89.1228			N2	43.8776		T197D	23.0769		j107	60.5809		T197D;j107	86.8217
	N2	73.1579		T197D	82.4		j107	51.25		T197D;j107	88.0109			N2	45.2381		T197D	31.0734		j107	61.7886		T197D;j107	86.1224
	N2	76.6447					j107	85.4922						N2	25.5102					j107	72.3926
	N2	77.7778					j107	84.1121						N2	33.1361					j107	68.9655
	N2	74.6269					j107	90.625						N2	31.4103					j107	63.0952
	N2	79.7203					j107	84.375						N2	24.6835					j107	77.2532
	N2	82.5688					j107	90.1887						N2	23.6181					j107	60.4167
	N2	73.5043					j107	78.6486						N2	27.7419					j107	70.5179
	N2	83.6735												N2	36.9427
	N2	83.3333												N2	19.4969
	N2	87.8378												N2	19.802

## Sheet: Figure 3c
pot-hoc tests					0.722			0.495			0.547							0.028			0.298			< .001							0.86			< .001			0.208
replicates		n=27			n=12			n=27			n=12				n=9			n=9			n=9			n=9				n=27			n=12			n=27			n=12
time		T0			T0			T0			T0				T30			T30			T30			T30				T60			T60			T60			T60
	N2CycA-	82.1138		T179DCycA-	81.6456		N2CycA+	68.9189		T179DCycA+	82.0312			N2CycA-	82.6087		T179DCycA-	61.3636		N2CycA+	73.6434		T179DCycA+	40.404			N2CycA-	18.1818		T179DCycA-	27.3885		N2CycA+	71.6535		T179DCycA+	30.3279
	N2CycA-	78.4314		T179DCycA-	69.7479		N2CycA+	74.8503		T179DCycA+	70.625			N2CycA-	75.817		T179DCycA-	43.1034		N2CycA+	86.3636		T179DCycA+	19.8473			N2CycA-	13.9241		T179DCycA-	28		N2CycA+	59.4203		T179DCycA+	26.3158
	N2CycA-	69.1275		T179DCycA-	89.375		N2CycA+	79.1045		T179DCycA+	82.0513			N2CycA-	66.9118		T179DCycA-	71.7949		N2CycA+	86.3946		T179DCycA+	32.0261			N2CycA-	25		T179DCycA-	40.7767		N2CycA+	74.8387		T179DCycA+	44.0367
	N2CycA-	77.5401		T179DCycA-	82.069		N2CycA+	78.534		T179DCycA+	76.0331			N2CycA-	70.7692		T179DCycA-	70		N2CycA+	49.4624		T179DCycA+	47.2868			N2CycA-	23.7288		T179DCycA-	34.4828		N2CycA+	84.4037		T179DCycA+	16.3793
	N2CycA-	78.8845		T179DCycA-	79.0576		N2CycA+	83.1325		T179DCycA+	61.3636			N2CycA-	62.5731		T179DCycA-	47.0968		N2CycA+	74.8466		T179DCycA+	31.5789			N2CycA-	21.6418		T179DCycA-	30.1435		N2CycA+	72.4138		T179DCycA+	17.9245
	N2CycA-	72.7273		T179DCycA-	80		N2CycA+	78.8945		T179DCycA+	80			N2CycA-	89.899		T179DCycA-	53.4247		N2CycA+	89.9281		T179DCycA+	50.8772			N2CycA-	42.1053		T179DCycA-	35		N2CycA+	80		T179DCycA+	26.1905
	N2CycA-	79.0698		T179DCycA-	84.9315		N2CycA+	79.2		T179DCycA+	75.641			N2CycA-	79.7297		T179DCycA-	78.1022		N2CycA+	74.5763		T179DCycA+	41.8033			N2CycA-	29.7872		T179DCycA-	33.7662		N2CycA+	86.2069		T179DCycA+	20.979
	N2CycA-	81.8713		T179DCycA-	76.7296		N2CycA+	88.6598		T179DCycA+	77.8443			N2CycA-	53.1034		T179DCycA-	57.4468		N2CycA+	79.5238		T179DCycA+	55.4795			N2CycA-	24.8826		T179DCycA-	37.5758		N2CycA+	35.3659		T179DCycA+	31.2849
	N2CycA-	75		T179DCycA-	78		N2CycA+	83.8983		T179DCycA+	78.2178			N2CycA-	71.5152		T179DCycA-	52.8926		N2CycA+	93.5065		T179DCycA+	48.5507			N2CycA-	51.9231		T179DCycA-	31.068		N2CycA+	66.9291		T179DCycA+	22.3881
	N2CycA-	84		T179DCycA-	74.2424		N2CycA+	69.3878		T179DCycA+	80.1471																N2CycA-	13.2231		T179DCycA-	45.5285		N2CycA+	64.5833		T179DCycA+	27.1028
	N2CycA-	76.2887		T179DCycA-	84.1727		N2CycA+	64.375		T179DCycA+	75																N2CycA-	10.8434		T179DCycA-	34.3949		N2CycA+	75.2941		T179DCycA+	45.2381
	N2CycA-	77.7778		T179DCycA-	66.1905		N2CycA+	81.1688		T179DCycA+	85.9375																N2CycA-	48.2993		T179DCycA-	32.6693		N2CycA+	79.3478		T179DCycA+	30.0885
	N2CycA-	87.0968					N2CycA+	83.0508																			N2CycA-	28.9474					N2CycA+	61.1765
	N2CycA-	77.9762					N2CycA+	85.3107																			N2CycA-	14.8571					N2CycA+	61.0526
	N2CycA-	80.1242					N2CycA+	78.9157																			N2CycA-	28.2828					N2CycA+	30.6122
	N2CycA-	77					N2CycA+	86.2069																			N2CycA-	16.7883					N2CycA+	74.2857
	N2CycA-	76.9231					N2CycA+	76.6129																			N2CycA-	17.2222					N2CycA+	52.459
	N2CycA-	79.1908					N2CycA+	79.8658																			N2CycA-	47.541					N2CycA+	58.8957
	N2CycA-	73.5099					N2CycA+	88.0597																			N2CycA-	56.7568					N2CycA+	57.0312
	N2CycA-	71.7742					N2CycA+	81																			N2CycA-	54.0741					N2CycA+	77.1654
	N2CycA-	84.3137					N2CycA+	65.8333																			N2CycA-	70.5036					N2CycA+	69.6133
	N2CycA-	69.0821					N2CycA+	88.6076																			N2CycA-	33.3333					N2CycA+	35.5372
	N2CycA-	78.2609					N2CycA+	75.5319																			N2CycA-	43.299					N2CycA+	74.8201
	N2CycA-	85.2941					N2CycA+	84.7222																			N2CycA-	71.2871					N2CycA+	85.0932
	N2CycA-	77.2277					N2CycA+	81.457																			N2CycA-	38.2716					N2CycA+	34.6774
	N2CycA-	74.5562					N2CycA+	70																			N2CycA-	54.4828					N2CycA+	63.2124
	N2CycA-	85.8447					N2CycA+	85.3147																			N2CycA-	50.3106					N2CycA+	69.9346
