# Supplementary material for: Antagonist actions of CMK-1/CaMKI and TAX-6/calcineurin along the C. elegans thermal avoidance circuit orchestrate adaptation of nociceptive response to repeated stimuli
Source: eLife. 2025 Apr 30;14:RP103497. doi: 10.7554/eLife.103497 (PMC12043318; doi:10.7554/eLife.103497)
Supplement: Figure 4—source data 1. [file elife-103497-fig4-data1.xlsx]

## Sheet: Figure 4a
pot-hoc tests								p= 0.554			p= 0.714			p= 0.007			p= 0.17										p < .001			p= 0.894			p < .001			p= 0.153
replicates		n=150			n=129			n=30			n=9			n=21			n=24				n=150			n=129			n=30			n=9			n=21			n=24
time		T0			T0			T0			T0			T0			T0				T60			T60			T60			T60			T60			T60
	N2	70.1389		ok287	81.5385		cmk-1p	82.5581		mec-3p	86.7188		tax-4p	88.8889		glr-1p	79.6296			N2	30.5344		ok287	80.4878		cmk-1p	58.9744		mec-3p	79.6875		tax-4p	73.913		glr-1p	90.9091
	N2	75		ok287	83.871		cmk-1p	85.7143		mec-3p	75.1479		tax-4p	89.4737		glr-1p	75			N2	41.0256		ok287	80		cmk-1p	89.2857		mec-3p	68.2927		tax-4p	84.3137		glr-1p	85
	N2	85		ok287	82.4742		cmk-1p	80		mec-3p	78.1893		tax-4p	81.8792		glr-1p	92.8571			N2	25.6757		ok287	77.193		cmk-1p	65.7143		mec-3p	76.1905		tax-4p	65.2174		glr-1p	86.9565
	N2	87.3563		ok287	84.6939		cmk-1p	70.1923		mec-3p	75.7962		tax-4p	84.9057		glr-1p	84.9315			N2	28.2353		ok287	78.2609		cmk-1p	73.913		mec-3p	83.432		tax-4p	38.8889		glr-1p	69.2308
	N2	78.5185		ok287	81.4607		cmk-1p	84.5455		mec-3p	76.6067		tax-4p	88.8889		glr-1p	88.8889			N2	27.8689		ok287	70.4545		cmk-1p	65.9574		mec-3p	86.3636		tax-4p	73.0769		glr-1p	80
	N2	82.659		ok287	74.5803		cmk-1p	81.1111		mec-3p	87.8136		tax-4p	84.2105		glr-1p	95			N2	51.5152		ok287	80.1105		cmk-1p	56.8182		mec-3p	85.5932		tax-4p	53.0612		glr-1p	86.3636
	N2	74.5098		ok287	80.826		cmk-1p	82.8125		mec-3p	79.2857		tax-4p	85.3333		glr-1p	85.9155			N2	51.5152		ok287	83.1579		cmk-1p	91.3043		mec-3p	80.6452		tax-4p	50		glr-1p	100
	N2	73.8854		ok287	76.0391		cmk-1p	77.6316		mec-3p	85.5346		tax-4p	80.6122		glr-1p	60			N2	61.9048		ok287	84.058		cmk-1p	80.7692		mec-3p	86.9159		tax-4p	46.875		glr-1p	80
	N2	87.9121		ok287	89.9371		cmk-1p	89.7959		mec-3p	77.1784		tax-4p	82.1782		glr-1p	81.8182			N2	32.3944		ok287	94.8276		cmk-1p	84.4444		mec-3p	80		tax-4p	83.0508		glr-1p	90.4762
	N2	82.6531		ok287	83.8462		cmk-1p	84.6154					tax-4p	85.0877		glr-1p	91.3793			N2	39.6552		ok287	86.4198		cmk-1p	85.7143					tax-4p	45.7627		glr-1p	92.3077
	N2	88.8889		ok287	89.6825		cmk-1p	82.3529					tax-4p	91.25		glr-1p	80.7692			N2	23.5294		ok287	88.5246		cmk-1p	77.7778					tax-4p	68.254		glr-1p	85.7143
	N2	79.3814		ok287	88		cmk-1p	70.2128					tax-4p	85.2459		glr-1p	71.1111			N2	58.0357		ok287	79.0323		cmk-1p	77.7778					tax-4p	26.6667		glr-1p	92.3077
	N2	80.9524		ok287	80.1325		cmk-1p	84.2105					tax-4p	86.8852		glr-1p	86.9565			N2	74.0506		ok287	84.9315		cmk-1p	60					tax-4p	28.5714		glr-1p	72.2222
	N2	73.1844		ok287	82.7778		cmk-1p	81.0811					tax-4p	84.8101		glr-1p	90.4762			N2	43.2		ok287	82.0513		cmk-1p	74.1935					tax-4p	65.2778		glr-1p	66.6667
	N2	72.4265		ok287	82.7957		cmk-1p	83.5443					tax-4p	80.8511		glr-1p	84.8485			N2	14.4578		ok287	81.0811		cmk-1p	82.6923					tax-4p	63.8298		glr-1p	92.3077
	N2	71.4912		ok287	57.7982		cmk-1p	73.6842					tax-4p	75.3623		glr-1p	83.3333			N2	36.4583		ok287	40.9091		cmk-1p	78.4314					tax-4p	17.3913		glr-1p	66.6667
	N2	73.399		ok287	84.1202		cmk-1p	81.8182					tax-4p	91.7808		glr-1p	91.1765			N2	20.2381		ok287	81.25		cmk-1p	85.3659					tax-4p	62.5		glr-1p	92.3077
	N2	74.0566		ok287	81.295		cmk-1p	74.1935					tax-4p	91.4894		glr-1p	82.8571			N2	60.3053		ok287	82		cmk-1p	79.1667					tax-4p	55.5556		glr-1p	86.9565
	N2	78.1955		ok287	89.1892		cmk-1p	71.831					tax-4p	84.507		glr-1p	78.5714			N2	68.9655		ok287	91.6667		cmk-1p	85.1351					tax-4p	38.0952		glr-1p	80
	N2	66.9782		ok287	74.7126		cmk-1p	76.2376					tax-4p	83.1169		glr-1p	78.5714			N2	67.3171		ok287	88.0435		cmk-1p	43.3962					tax-4p	67.5		glr-1p	92.5926
	N2	83.3333		ok287	81.3187		cmk-1p	70.4918					tax-4p	86.5854		glr-1p	79.4118			N2	31.6456		ok287	91.8367		cmk-1p	72.9167					tax-4p	69.3878		glr-1p	92
	N2	66.4286		ok287	76.8844		cmk-1p	84.9315								glr-1p	77.3585			N2	29.6296		ok287	66.6667		cmk-1p	80								glr-1p	85.7143
	N2	83.8235		ok287	75.7009		cmk-1p	80.7018								glr-1p	92.3077			N2	59.6273		ok287	76.9231		cmk-1p	75								glr-1p	87.6106
	N2	84.4687		ok287	79.8883		cmk-1p	94.8052								glr-1p	85.7143			N2	61.6667		ok287	88.7097		cmk-1p	65.7895								glr-1p	83.3333
	N2	86.4734		ok287	79.602		cmk-1p	86.6667												N2	79.661		ok287	87.3684		cmk-1p	48.1481
	N2	82.4561		ok287	76.8392		cmk-1p	75												N2	81.1224		ok287	76.5957		cmk-1p	50
	N2	83.8816		ok287	76.3473		cmk-1p	80.9524												N2	44.3609		ok287	83.5366		cmk-1p	50
	N2	76.9737		ok287	78.0392		cmk-1p	87.6812												N2	45.122		ok287	86.6667		cmk-1p	66.6667
	N2	83.7563		ok287	68.75		cmk-1p	67.9245												N2	37.7778		ok287	86.7647		cmk-1p	72.9167
	N2	86.3095		ok287	65.8915		cmk-1p	81.5385												N2	20		ok287	76.4706		cmk-1p	43.75
	N2	78.3898		ok287	88.3978															N2	12.3077		ok287	80.3419
	N2	73.3083		ok287	87.1324															N2	32.4675		ok287	81.3953
	N2	80.1282		ok287	80.7547															N2	12.3894		ok287	80.8411
	N2	66.6667		ok287	77.4648															N2	25.9259		ok287	73.1707
	N2	54.4118		ok287	95.6897															N2	18.9474		ok287	95.1613
	N2	61.4286		ok287	82.5175															N2	25.8621		ok287	73.494
	N2	74.6479		ok287	74.6914															N2	25		ok287	80.3738
	N2	69.6721		ok287	76.6839															N2	59.5041		ok287	76.1468
	N2	85.9375		ok287	78.9474															N2	38.6364		ok287	89.6552
	N2	72.0238		ok287	82.5															N2	37.8151		ok287	90.6542
	N2	71.4286		ok287	91.791															N2	30.4348		ok287	91.3043
	N2	68.8976		ok287	81.9149															N2	54.5455		ok287	94.4444
	N2	78.4431		ok287	86.2385															N2	50.5618		ok287	87.2483
	N2	86.4583		ok287	85.7143															N2	80.916		ok287	86.3636
	N2	73.3728		ok287	87.0968															N2	57.8947		ok287	94.1176
	N2	71.2766		ok287	87.2727															N2	43.5484		ok287	95.3488
	N2	78.0822		ok287	85.2459															N2	59.1837		ok287	69.4444
	N2	64.9351		ok287	85.5346															N2	46.3768		ok287	87.931
	N2	75.1381		ok287	92.8571															N2	33.6364		ok287	95.6522
	N2	73.494		ok287	75.3968															N2	34.4828		ok287	88
	N2	83.0189		ok287	63.8298															N2	56.044		ok287	90
	N2	68.6957		ok287	81.2903															N2	29.078		ok287	85
	N2	77.3109		ok287	79.2453															N2	33.0144		ok287	80.2326
	N2	83.5766		ok287	68.5714															N2	59.375		ok287	84.6154
	N2	74.4318		ok287	92.7928															N2	69.1176		ok287	74.1935
	N2	71.0317		ok287	77.8523															N2	29.5597		ok287	89.3617
	N2	75		ok287	80.3109															N2	41.3333		ok287	79.5918
	N2	91.8919		ok287	92.7835															N2	41.5663		ok287	86.9565
	N2	72.2628		ok287	89.0351															N2	14.5985		ok287	88.3333
	N2	82.2917		ok287	91.7241															N2	32.6087		ok287	82.7586
	N2	75		ok287	86.3905															N2	35.9375		ok287	77.8302
	N2	87.963		ok287	75.6614															N2	22.3881		ok287	80.4348
	N2	88.3978		ok287	82.8729															N2	26.1364		ok287	89.7727
	N2	77.4011		ok287	73.716															N2	26.1745		ok287	87.1429
	N2	72.093		ok287	78.1726															N2	72.4138		ok287	88.4615
	N2	78.022		ok287	84.3373															N2	81.1688		ok287	71.7949
	N2	83.5897		ok287	72.3247															N2	92.7083		ok287	73.7705
	N2	52.6316		ok287	83.5878															N2	31.5385		ok287	83.7838
	N2	70.9434		ok287	76.2082															N2	44.2623		ok287	74.4444
	N2	83.8028		ok287	86.9792															N2	50.6173		ok287	80.1887
	N2	84.3537		ok287	73.3668															N2	43.2692		ok287	88
	N2	73.75		ok287	68.4564															N2	50		ok287	84.466
	N2	82.1918		ok287	85.0847															N2	54.717		ok287	88.7417
	N2	71.2389		ok287	84.5771															N2	57.8512		ok287	88.75
	N2	75.2381		ok287	80.0797															N2	29.5455		ok287	80.6122
	N2	83.8028		ok287	81.2308															N2	18.0851		ok287	70.1754
	N2	71.118		ok287	81.3291															N2	35.6589		ok287	72.4771
	N2	75.8772		ok287	74.5098															N2	26.7442		ok287	90.7143
	N2	80.8219		ok287	88.5057															N2	31.0924		ok287	85.7143
	N2	86.5854		ok287	72.0588															N2	24.2604		ok287	87.037
	N2	77.6271		ok287	65.625															N2	36.4286		ok287	89.5522
	N2	73.913		ok287	78.75															N2	37.9845		ok287	80.303
	N2	73.4463		ok287	84.8684															N2	48.5149		ok287	37.1795
	N2	80.4878		ok287	76.1468															N2	55		ok287	24.2424
	N2	73.8532		ok287	79.3478															N2	53.8462		ok287	33.8028
	N2	76.1006		ok287	78.9855															N2	55.3571		ok287	84.2857
	N2	80.4233		ok287	76.1062															N2	16.6667		ok287	83.3333
	N2	75.5952		ok287	80															N2	37.7193		ok287	81.3187
	N2	68.6667		ok287	88.4793															N2	29.4737		ok287	91.5493
	N2	75.1412		ok287	88.8889															N2	18.4466		ok287	92
	N2	68.1452		ok287	90.1042															N2	43.6548		ok287	84.9624
	N2	88.4211		ok287	86.755															N2	41.4286		ok287	80
	N2	76.5714		ok287	87.9433															N2	16.6667		ok287	83.1461
	N2	83.3333		ok287	73.0769															N2	66.6667		ok287	89.3855
	N2	86.4198		ok287	78.0591															N2	50.5495		ok287	89.7321
	N2	58.2278		ok287	84.7716															N2	36.25		ok287	86
	N2	65.6863		ok287	85.7143															N2	42.5532		ok287	76.378
	N2	74.1935		ok287	93.4211															N2	63.0137		ok287	73.1343
	N2	76.6129		ok287	83.4437															N2	40.2778		ok287	84.5588
	N2	78.3784		ok287	83.7607															N2	20.6897		ok287	92.5926
	N2	66.9291		ok287	85.3147															N2	31.7757		ok287	78.5714
	N2	72.6415		ok287	90.411															N2	19.2		ok287	90.9091
	N2	69.9029		ok287	78.9773															N2	48.9933		ok287	70.5882
	N2	77.2414		ok287	85.8974															N2	78.4946		ok287	74.6835
	N2	84.7458		ok287	90.5405															N2	60.8696		ok287	89.8305
	N2	79.8165		ok287	87.5															N2	49.4382		ok287	81.0345
		61.3293		ok287	86.631																88.4956		ok287	89.5652
		70		ok287	83.3333																34.5133		ok287	78.9474
		77.0642		ok287	67.9012																27.3381		ok287	79.1045
		76.5363		ok287	80.3279																75		ok287	85.8696
		82.9897		ok287	82.7103																21.4286		ok287	77.7778
		81.0345		ok287	84																40.8163		ok287	79.2793
		74.1117		ok287	83.8028																16.4062		ok287	81.25
		65.7277		ok287	81.1321																12.2951		ok287	87.8788
		68.0272		ok287	73.6842																42.0635		ok287	85.2459
		52.2936		ok287	89.7059																28		ok287	85.9259
		75.8065		ok287	83.8174																44.7917		ok287	84.6847
		46.3768		ok287	75																41.1765		ok287	73.3333
		66.6667		ok287	82.0809																77.1739		ok287	71.4286
		63.6364		ok287	76.1194																34.3434		ok287	66.3934
		77.6699		ok287	84.6847																33.8983		ok287	33.3333
		74.4526		ok287	61.6667																38.3838		ok287	84.375
		75.9494		ok287	73.3945																22.5		ok287	83.6879
		89.0411		ok287	79.0419																41.791		ok287	91.8919
		71.0983		ok287	76.4706																35.2381		ok287	87.6543
		78.5124		ok287	90.4255																13.5135		ok287	88.0435
		67.284		ok287	78.4553																25.641		ok287	79.6296
		75.8621		ok287	70.8995																48.5714		ok287	84.5161
		68.8235		ok287	76.2238																19.4444		ok287	73.9583
		75.9494																			24.2105
		73.913																			47.561
		75.7576																			55.5556
		77.7174																			51.3889
		78.7709																			27.9279
		77.5229																			38.5965
		82.3529																			65.8537
		74.5223																			28.8889
		86.7647																			38.8235
		79.5082																			32.6389
		79.8701																			24
		76.6234																			57.3964
		62.1622																			20.4082
		80.3571																			34.5324
		78.5714																			14.2857
		86.2275																			20.8861
		66.2338																			25.5814
		78.1818																			26.8116
		69.5122																			50
		80.9524																			42.6966
		75.5319																			49.6774

## Sheet: Figure 4b
pot-hoc tests								0.925			< .001			0.068			< .001			< .001			0.026			0.868										0.681			0.669			< .001			0.134			< .001
replicates		n=150			n=129			n=9			n=15			n=27			n=18			n=24			n=35			n=33				n=150			n=129			n=9			n=15			n=27			n=18			n=24
time		T0			T0			T0			T0			T0			T0			T0			T0			T0				T60			T60			T60			T60			T60			T60			T60
	N2	70.1389		ok287	81.5385		gpa-4p	75		str-2p;srsx-3p	80.7229		gcy-5p;gcy-6p	89.0411		gcy-6p	90.3846		gcy-5p	82.3529		ttx-1	84.058		ttx-1_gcy-5	73.4513			N2	30.5344		ok287	80.4878			77.5		str-2p;srsx-3p	78.6885		gcy-5p;gcy-6p	58		gcy-6p	90.5405		gcy-5p	67.7419
	N2	75		ok287	83.871		gpa-4p	78.5714		str-2p;srsx-3p	80.6452		gcy-5p;gcy-6p	91.3043		gcy-6p	66.6667		gcy-5p	78.8462		ttx-1	83.3333		ttx-1_gcy-5	94.1176			N2	41.0256		ok287	80		gpa-4p	67.6471		str-2p;srsx-3p	81.25		gcy-5p;gcy-6p	70.8333		gcy-6p	76.1905		gcy-5p	67.3469
	N2	85		ok287	82.4742		gpa-4p	70.7071		str-2p;srsx-3p	74.6667		gcy-5p;gcy-6p	78.1818		gcy-6p	85.7143		gcy-5p	93.1034		ttx-1	76.9231		ttx-1_gcy-5	87.2093			N2	25.6757		ok287	77.193		gpa-4p	73.5294		str-2p;srsx-3p	84.0909		gcy-5p;gcy-6p	74.1935		gcy-6p	83.7838		gcy-5p	59.375
	N2	87.3563		ok287	84.6939		gpa-4p	82.5301		str-2p;srsx-3p	50.7937		gcy-5p;gcy-6p	91.4062		gcy-6p	92.0792		gcy-5p	81		ttx-1	73.913		ttx-1_gcy-5	81.2081			N2	28.2353		ok287	78.2609		gpa-4p	95.8333		str-2p;srsx-3p	66.6667		gcy-5p;gcy-6p	67.3077		gcy-6p	89.8148		gcy-5p	73.5294
	N2	78.5185		ok287	81.4607		gpa-4p	77.4648		str-2p;srsx-3p	66.3043		gcy-5p;gcy-6p	89.8876		gcy-6p	90.5797		gcy-5p	90.099		ttx-1	63.1579		ttx-1_gcy-5	88.9831			N2	27.8689		ok287	70.4545		gpa-4p	76.6234		str-2p;srsx-3p	82.7586		gcy-5p;gcy-6p	71.4286		gcy-6p	92.2535		gcy-5p	84.6154
	N2	82.659		ok287	74.5803		gpa-4p	78.0952		str-2p;srsx-3p	55.9322		gcy-5p;gcy-6p	93.6842		gcy-6p	89.404		gcy-5p	88.7755		ttx-1	71.831		ttx-1_gcy-5	83.432			N2	51.5152		ok287	80.1105		gpa-4p	78.0488		str-2p;srsx-3p	73.3333		gcy-5p;gcy-6p	73.8095		gcy-6p	90.5512		gcy-5p	81.0345
	N2	74.5098		ok287	80.826		gpa-4p	92		str-2p;srsx-3p	80.4511		gcy-5p;gcy-6p	91.0569		gcy-6p	80		gcy-5p	95.4545		ttx-1	42.3077		ttx-1_gcy-5	92.5			N2	51.5152		ok287	83.1579		gpa-4p	91.0714		str-2p;srsx-3p	77.3109		gcy-5p;gcy-6p	69.4215		gcy-6p	92.8571		gcy-5p	64.2857
	N2	73.8854		ok287	76.0391		gpa-4p	82.1429		str-2p;srsx-3p	77.8571		gcy-5p;gcy-6p	73.1707		gcy-6p	94.6667		gcy-5p	86.2069		ttx-1	68.9189		ttx-1_gcy-5	85.4369			N2	61.9048		ok287	84.058		gpa-4p	94.8718		str-2p;srsx-3p	80.5556		gcy-5p;gcy-6p	53.5714		gcy-6p	91.3043		gcy-5p	58.3333
	N2	87.9121		ok287	89.9371		gpa-4p	95.5882		str-2p;srsx-3p	85.9504		gcy-5p;gcy-6p	90.9091		gcy-6p	89.4737		gcy-5p	90.4762		ttx-1	56.25		ttx-1_gcy-5	85.4545			N2	32.3944		ok287	94.8276		gpa-4p	91.4286		str-2p;srsx-3p	82.5		gcy-5p;gcy-6p	62.9213		gcy-6p	81.5789		gcy-5p	65.3846
	N2	82.6531		ok287	83.8462					str-2p;srsx-3p	82.3171		gcy-5p;gcy-6p	78.0822		gcy-6p	93.1973		gcy-5p	94.2529		ttx-1	64.8649		ttx-1_gcy-5	70.0637			N2	39.6552		ok287	86.4198					str-2p;srsx-3p	87.9121		gcy-5p;gcy-6p	56.3218		gcy-6p	93.6937		gcy-5p	92.0635
	N2	88.8889		ok287	89.6825					str-2p;srsx-3p	73.1183		gcy-5p;gcy-6p	87.931		gcy-6p	93.6508		gcy-5p	84.3137		ttx-1	44.0476		ttx-1_gcy-5	78.7611			N2	23.5294		ok287	88.5246					str-2p;srsx-3p	87.5		gcy-5p;gcy-6p	32.6087		gcy-6p	80.2198		gcy-5p	70.2381
	N2	79.3814		ok287	88					str-2p;srsx-3p	64.8649		gcy-5p;gcy-6p	86.2069		gcy-6p	94.8276		gcy-5p	92.7083		ttx-1	78.5714		ttx-1_gcy-5	73.1034			N2	58.0357		ok287	79.0323					str-2p;srsx-3p	83.1325		gcy-5p;gcy-6p	51.5152		gcy-6p	74.0741		gcy-5p	88.764
	N2	80.9524		ok287	80.1325					str-2p;srsx-3p	66.2162		gcy-5p;gcy-6p	74.8092		gcy-6p	85.2941		gcy-5p	86.1538		ttx-1	88.0952		ttx-1_gcy-5	81.9549			N2	74.0506		ok287	84.9315					str-2p;srsx-3p	77.7778		gcy-5p;gcy-6p	80.198		gcy-6p	80.6452		gcy-5p	59.4595
	N2	73.1844		ok287	82.7778					str-2p;srsx-3p	66.8269		gcy-5p;gcy-6p	68.1416		gcy-6p	84.127		gcy-5p	84.0278		ttx-1	70.2128		ttx-1_gcy-5	78.3333			N2	43.2		ok287	82.0513					str-2p;srsx-3p	81.457		gcy-5p;gcy-6p	50		gcy-6p	93.1818		gcy-5p	58.4158
	N2	72.4265		ok287	82.7957					str-2p;srsx-3p	77.4834		gcy-5p;gcy-6p	77.7778		gcy-6p	86.6667		gcy-5p	91.8033		ttx-1	73.8916		ttx-1_gcy-5	81.3084			N2	14.4578		ok287	81.0811					str-2p;srsx-3p	75.1938		gcy-5p;gcy-6p	80.5405		gcy-6p	83.3333		gcy-5p	52.1277
	N2	71.4912		ok287	57.7982								gcy-5p;gcy-6p	85.1312		gcy-6p	85.7143		gcy-5p	87.5776		ttx-1	84.4749		ttx-1_gcy-5	88			N2	36.4583		ok287	40.9091								gcy-5p;gcy-6p	77.2455		gcy-6p	73.6842		gcy-5p	68.4211
	N2	73.399		ok287	84.1202								gcy-5p;gcy-6p	85.1974		gcy-6p	94.1176		gcy-5p	90		ttx-1	75.4717		ttx-1_gcy-5	80.3571			N2	20.2381		ok287	81.25								gcy-5p;gcy-6p	64.3312		gcy-6p	85		gcy-5p	51.6129
	N2	74.0566		ok287	81.295								gcy-5p;gcy-6p	84.1629		gcy-6p	82.6087		gcy-5p	90.3614		ttx-1	90.3509		ttx-1_gcy-5	91.6667			N2	60.3053		ok287	82								gcy-5p;gcy-6p	61.5385		gcy-6p	86.9565		gcy-5p	65.2174
	N2	78.1955		ok287	89.1892								gcy-5p;gcy-6p	78.1818					gcy-5p	92.5926		ttx-1	81.1594		ttx-1_gcy-5	83			N2	68.9655		ok287	91.6667								gcy-5p;gcy-6p	85.1064					gcy-5p	50
	N2	66.9782		ok287	74.7126								gcy-5p;gcy-6p	88.2353					gcy-5p	73.1343		ttx-1	87.037		ttx-1_gcy-5	83.4862			N2	67.3171		ok287	88.0435								gcy-5p;gcy-6p	66.6667					gcy-5p	63.1579
	N2	83.3333		ok287	81.3187								gcy-5p;gcy-6p	79.0323					gcy-5p	80.3922		ttx-1	90.9091		ttx-1_gcy-5	93.75			N2	31.6456		ok287	91.8367								gcy-5p;gcy-6p	78.8462					gcy-5p	52.7273
	N2	66.4286		ok287	76.8844								gcy-5p;gcy-6p	79.2					gcy-5p	90.9091		ttx-1	83.4025		ttx-1_gcy-5	69			N2	29.6296		ok287	66.6667								gcy-5p;gcy-6p	77.381					gcy-5p	72.9167
	N2	83.8235		ok287	75.7009								gcy-5p;gcy-6p	81.8792					gcy-5p	83.3333		ttx-1	91.791		ttx-1_gcy-5	81.5385			N2	59.6273		ok287	76.9231								gcy-5p;gcy-6p	74.2857					gcy-5p	77.9661
	N2	84.4687		ok287	79.8883								gcy-5p;gcy-6p	87.3288					gcy-5p	84.4828		ttx-1	88.8889		ttx-1_gcy-5	87.5			N2	61.6667		ok287	88.7097								gcy-5p;gcy-6p	72.4138					gcy-5p	76.5957
	N2	86.4734		ok287	79.602								gcy-5p;gcy-6p	87.7273								ttx-1	85.5856		ttx-1_gcy-5	83.3333			N2	79.661		ok287	87.3684								gcy-5p;gcy-6p	86.3636
	N2	82.4561		ok287	76.8392								gcy-5p;gcy-6p	84.7222								ttx-1	86.6667		ttx-1_gcy-5	78.3133			N2	81.1224		ok287	76.5957								gcy-5p;gcy-6p	81.295
	N2	83.8816		ok287	76.3473								gcy-5p;gcy-6p	79.845								ttx-1	86.6279		ttx-1_gcy-5	83.3333			N2	44.3609		ok287	83.5366								gcy-5p;gcy-6p	84.2466
	N2	76.9737		ok287	78.0392																	ttx-1	81.4516		ttx-1_gcy-5	83.3333			N2	45.122		ok287	86.6667
	N2	83.7563		ok287	68.75																	ttx-1	73.8739		ttx-1_gcy-5	65.9389			N2	37.7778		ok287	86.7647
	N2	86.3095		ok287	65.8915																	ttx-1	76.8707		ttx-1_gcy-5	84.7059			N2	20		ok287	76.4706
	N2	78.3898		ok287	88.3978																	ttx-1	86.6071		ttx-1_gcy-5	75.9259			N2	12.3077		ok287	80.3419
	N2	73.3083		ok287	87.1324																	ttx-1	74.5283		ttx-1_gcy-5	69.9387			N2	32.4675		ok287	81.3953
	N2	80.1282		ok287	80.7547																	ttx-1	81.4815		ttx-1_gcy-5	66.0377			N2	12.3894		ok287	80.8411
	N2	66.6667		ok287	77.4648																	ttx-1	80.6818						N2	25.9259		ok287	73.1707
	N2	54.4118		ok287	95.6897																	ttx-1	87.1287						N2	18.9474		ok287	95.1613
	N2	61.4286		ok287	82.5175																								N2	25.8621		ok287	73.494
	N2	74.6479		ok287	74.6914																								N2	25		ok287	80.3738
	N2	69.6721		ok287	76.6839																								N2	59.5041		ok287	76.1468
	N2	85.9375		ok287	78.9474																								N2	38.6364		ok287	89.6552
	N2	72.0238		ok287	82.5																								N2	37.8151		ok287	90.6542
	N2	71.4286		ok287	91.791																								N2	30.4348		ok287	91.3043
	N2	68.8976		ok287	81.9149																								N2	54.5455		ok287	94.4444
	N2	78.4431		ok287	86.2385																								N2	50.5618		ok287	87.2483
	N2	86.4583		ok287	85.7143																								N2	80.916		ok287	86.3636
	N2	73.3728		ok287	87.0968																								N2	57.8947		ok287	94.1176
	N2	71.2766		ok287	87.2727																								N2	43.5484		ok287	95.3488
	N2	78.0822		ok287	85.2459																								N2	59.1837		ok287	69.4444
	N2	64.9351		ok287	85.5346																								N2	46.3768		ok287	87.931
	N2	75.1381		ok287	92.8571																								N2	33.6364		ok287	95.6522
	N2	73.494		ok287	75.3968																								N2	34.4828		ok287	88
	N2	83.0189		ok287	63.8298																								N2	56.044		ok287	90
	N2	68.6957		ok287	81.2903																								N2	29.078		ok287	85
	N2	77.3109		ok287	79.2453																								N2	33.0144		ok287	80.2326
	N2	83.5766		ok287	68.5714																								N2	59.375		ok287	84.6154
	N2	74.4318		ok287	92.7928																								N2	69.1176		ok287	74.1935
	N2	71.0317		ok287	77.8523																								N2	29.5597		ok287	89.3617
	N2	75		ok287	80.3109																								N2	41.3333		ok287	79.5918
	N2	91.8919		ok287	92.7835																								N2	41.5663		ok287	86.9565
	N2	72.2628		ok287	89.0351																								N2	14.5985		ok287	88.3333
	N2	82.2917		ok287	91.7241																								N2	32.6087		ok287	82.7586
	N2	75		ok287	86.3905																								N2	35.9375		ok287	77.8302
	N2	87.963		ok287	75.6614																								N2	22.3881		ok287	80.4348
	N2	88.3978		ok287	82.8729																								N2	26.1364		ok287	89.7727
	N2	77.4011		ok287	73.716																								N2	26.1745		ok287	87.1429
	N2	72.093		ok287	78.1726																								N2	72.4138		ok287	88.4615
	N2	78.022		ok287	84.3373																								N2	81.1688		ok287	71.7949
	N2	83.5897		ok287	72.3247																								N2	92.7083		ok287	73.7705
	N2	52.6316		ok287	83.5878																								N2	31.5385		ok287	83.7838
	N2	70.9434		ok287	76.2082																								N2	44.2623		ok287	74.4444
	N2	83.8028		ok287	86.9792																								N2	50.6173		ok287	80.1887
	N2	84.3537		ok287	73.3668																								N2	43.2692		ok287	88
	N2	73.75		ok287	68.4564																								N2	50		ok287	84.466
	N2	82.1918		ok287	85.0847																								N2	54.717		ok287	88.7417
	N2	71.2389		ok287	84.5771																								N2	57.8512		ok287	88.75
	N2	75.2381		ok287	80.0797																								N2	29.5455		ok287	80.6122
	N2	83.8028		ok287	81.2308																								N2	18.0851		ok287	70.1754
	N2	71.118		ok287	81.3291																								N2	35.6589		ok287	72.4771
	N2	75.8772		ok287	74.5098																								N2	26.7442		ok287	90.7143
	N2	80.8219		ok287	88.5057																								N2	31.0924		ok287	85.7143
	N2	86.5854		ok287	72.0588																								N2	24.2604		ok287	87.037
	N2	77.6271		ok287	65.625																								N2	36.4286		ok287	89.5522
	N2	73.913		ok287	78.75																								N2	37.9845		ok287	80.303
	N2	73.4463		ok287	84.8684																								N2	48.5149		ok287	37.1795
	N2	80.4878		ok287	76.1468																								N2	55		ok287	24.2424
	N2	73.8532		ok287	79.3478																								N2	53.8462		ok287	33.8028
	N2	76.1006		ok287	78.9855																								N2	55.3571		ok287	84.2857
	N2	80.4233		ok287	76.1062																								N2	16.6667		ok287	83.3333
	N2	75.5952		ok287	80																								N2	37.7193		ok287	81.3187
	N2	68.6667		ok287	88.4793																								N2	29.4737		ok287	91.5493
	N2	75.1412		ok287	88.8889																								N2	18.4466		ok287	92
	N2	68.1452		ok287	90.1042																								N2	43.6548		ok287	84.9624
	N2	88.4211		ok287	86.755																								N2	41.4286		ok287	80
	N2	76.5714		ok287	87.9433																								N2	16.6667		ok287	83.1461
	N2	83.3333		ok287	73.0769																								N2	66.6667		ok287	89.3855
	N2	86.4198		ok287	78.0591																								N2	50.5495		ok287	89.7321
	N2	58.2278		ok287	84.7716																								N2	36.25		ok287	86
	N2	65.6863		ok287	85.7143																								N2	42.5532		ok287	76.378
	N2	74.1935		ok287	93.4211																								N2	63.0137		ok287	73.1343
	N2	76.6129		ok287	83.4437																								N2	40.2778		ok287	84.5588
	N2	78.3784		ok287	83.7607																								N2	20.6897		ok287	92.5926
	N2	66.9291		ok287	85.3147																								N2	31.7757		ok287	78.5714
	N2	72.6415		ok287	90.411																								N2	19.2		ok287	90.9091
	N2	69.9029		ok287	78.9773																								N2	48.9933		ok287	70.5882
	N2	77.2414		ok287	85.8974																								N2	78.4946		ok287	74.6835
	N2	84.7458		ok287	90.5405																								N2	60.8696		ok287	89.8305
	N2	79.8165		ok287	87.5																								N2	49.4382		ok287	81.0345
		61.3293		ok287	86.631																									88.4956		ok287	89.5652
		70		ok287	83.3333																									34.5133		ok287	78.9474
		77.0642		ok287	67.9012																									27.3381		ok287	79.1045
		76.5363		ok287	80.3279																									75		ok287	85.8696
		82.9897		ok287	82.7103																									21.4286		ok287	77.7778
		81.0345		ok287	84																									40.8163		ok287	79.2793
		74.1117		ok287	83.8028																									16.4062		ok287	81.25
		65.7277		ok287	81.1321																									12.2951		ok287	87.8788
		68.0272		ok287	73.6842																									42.0635		ok287	85.2459
		52.2936		ok287	89.7059																									28		ok287	85.9259
		75.8065		ok287	83.8174																									44.7917		ok287	84.6847
		46.3768		ok287	75																									41.1765		ok287	73.3333
		66.6667		ok287	82.0809																									77.1739		ok287	71.4286
		63.6364		ok287	76.1194																									34.3434		ok287	66.3934
		77.6699		ok287	84.6847																									33.8983		ok287	33.3333
		74.4526		ok287	61.6667																									38.3838		ok287	84.375
		75.9494		ok287	73.3945																									22.5		ok287	83.6879
		89.0411		ok287	79.0419																									41.791		ok287	91.8919
		71.0983		ok287	76.4706																									35.2381		ok287	87.6543
		78.5124		ok287	90.4255																									13.5135		ok287	88.0435
		67.284		ok287	78.4553																									25.641		ok287	79.6296
		75.8621		ok287	70.8995																									48.5714		ok287	84.5161
		68.8235		ok287	76.2238																									19.4444		ok287	73.9583
		75.9494																												24.2105
		73.913																												47.561
		75.7576																												55.5556
		77.7174																												51.3889
		78.7709																												27.9279
		77.5229																												38.5965
		82.3529																												65.8537
		74.5223																												28.8889
		86.7647																												38.8235
		79.5082																												32.6389
		79.8701																												24
		76.6234																												57.3964
		62.1622																												20.4082
		80.3571																												34.5324
		78.5714																												14.2857
		86.2275																												20.8861
		66.2338																												25.5814
		78.1818																												26.8116
		69.5122																												50
		80.9524																												42.6966
		75.5319																												49.6774
[truncated: 4 more columns]

## Sheet: Figure 4c
pot-hoc tests								p= 0.96		p < .001				p=0.154		p < .001
replicates		n=30		n=30				n=9		n=9				n=21		n=21
time		T0		T60				T0		T60				T0		T60
	N2	86.2275	N2	58.3333			AFD(-)	68.254	AFD(-)	62.069			gcy-8p::tetx	73.8095	gcy-8p::tetx	60.8911
	N2	68.2759	N2	41.5094			AFD(-)	69.7479	AFD(-)	53.4091			gcy-8p::tetx	75	gcy-8p::tetx	62.963
	N2	82.7957	N2	25			AFD(-)	74.0566	AFD(-)	54.5455			gcy-8p::tetx	75.5102	gcy-8p::tetx	81.0606
	N2	61.3821	N2	41.0959			AFD(-)	75.3769	AFD(-)	51.2821			gcy-8p::tetx	78.9116	gcy-8p::tetx	84.5528
	N2	67.4312	N2	60			AFD(-)	67.234	AFD(-)	45.3125			gcy-8p::tetx	80.9278	gcy-8p::tetx	82.6446
	N2	70.122	N2	52.381			AFD(-)	83.7438	AFD(-)	44.8718			gcy-8p::tetx	76.4368	gcy-8p::tetx	76.5432
	N2	70.3863	N2	36.25			AFD(-)	76.8657	AFD(-)	86.0465			gcy-8p::tetx	85.124	gcy-8p::tetx	79.0476
	N2	86.9565	N2	58.1818			AFD(-)	78.9744	AFD(-)	74.7475			gcy-8p::tetx	80.3922	gcy-8p::tetx	74.359
	N2	76.6234	N2	34.4828			AFD(-)	81.1594	AFD(-)	69.2308			gcy-8p::tetx	77.2059	gcy-8p::tetx	80.5195
	N2	74.2268	N2	11.4865									gcy-8p::tetx	73.5	gcy-8p::tetx	77.8409
	N2	82.7103	N2	21.2121									gcy-8p::tetx	74.7788	gcy-8p::tetx	78.1065
	N2	77.1277	N2	41.0448									gcy-8p::tetx	75.6098	gcy-8p::tetx	78.7037
	N2	77.3913	N2	14.6341									gcy-8p::tetx	86.4662	gcy-8p::tetx	85.7143
	N2	75.6303	N2	17.0732									gcy-8p::tetx	80.402	gcy-8p::tetx	89.4118
	N2	85.1429	N2	25.8621									gcy-8p::tetx	80.8612	gcy-8p::tetx	85.3147
	N2	77.3869	N2	34.4828									gcy-8p::tetx	70.5521	gcy-8p::tetx	84.8
	N2	74.1667	N2	44.2029									gcy-8p::tetx	73.4463	gcy-8p::tetx	80.597
	N2	78.5408	N2	58.3333									gcy-8p::tetx	81.5126	gcy-8p::tetx	79.5181
	N2	79.1367	N2	24.1611									gcy-8p::tetx	71.7391	gcy-8p::tetx	71.4286
	N2	79.1367	N2	18.018									gcy-8p::tetx	70	gcy-8p::tetx	77.2727
	N2	64.7619	N2	27.6923									gcy-8p::tetx	82.8358	gcy-8p::tetx	80
	N2	61.8705	N2	54.5455
	N2	68.4932	N2	15.8333
	N2	70.2703	N2	38.0282
	N2	72.1925	N2	45.9016
	N2	69.0141	N2	51.0638
	N2	78.2051	N2	49.3421
	N2	74.0458	N2	58.6777
	N2	78.8991	N2	50.6329
	N2	79.0323	N2	43.299
