# Supplementary material for: Antagonist actions of CMK-1/CaMKI and TAX-6/calcineurin along the C. elegans thermal avoidance circuit orchestrate adaptation of nociceptive response to repeated stimuli
Source: eLife. 2025 Apr 30;14:RP103497. doi: 10.7554/eLife.103497 (PMC12043318; doi:10.7554/eLife.103497)
Supplement: Figure 5—source data 1. [file elife-103497-fig5-data1.xlsx]

## Sheet: Figure 5a
pot-hoc tests					p < .001			p < .001			p= 0.928			p= 0.048							p < .001			p= 0.051			p= 0.006			p < .001
replicates		n=76			n=75			n=10			n=21			n=18				n=76			n=75			n=10			n=21			n=18
time		T0			T0			T0			T0			T0				T60			T60			T60			T60			T60
	N2	54.0541		j107	82.381		mec-3p	72.5806		tax-4p	68.0328		glr-1p	64.8069			N2	12.963		j107	82.6923		mec-3p	40.7407		tax-4p	24.1758		glr-1p	72.8
	N2	68.8742		j107	77.8894		mec-3p	92		tax-4p	74.1758		glr-1p	80.9091			N2	27.2189		j107	80.2632		mec-3p	23.0769		tax-4p	20.1613		glr-1p	64.4444
	N2	52		j107	77.3723		mec-3p	88.4956		tax-4p	73.6842		glr-1p	73.7705			N2	37.5691		j107	79.8507		mec-3p	55.9055		tax-4p	26.6667		glr-1p	61.3636
	N2	71.6216		j107	76.7442		mec-3p	78.4091		tax-4p	68.2759		glr-1p	68.0921			N2	61.3636		j107	81.6176		mec-3p	61.2245		tax-4p	14.6341		glr-1p	56.0606
	N2	73.4513		j107	85.3107		mec-3p	79.0909		tax-4p	67.5393		glr-1p	79.078			N2	20.8589		j107	85.1064		mec-3p	29.7619		tax-4p	23.4848		glr-1p	62.8866
	N2	74.8538		j107	87.931		mec-3p	74.0458		tax-4p	71.7703		glr-1p	67.2131			N2	30.1676		j107	84.4444		mec-3p	42.3729		tax-4p	24.1135		glr-1p	68.125
	N2	76.0234		j107	74.7573		mec-3p	83.7209		tax-4p	79.375		glr-1p	80.6452			N2	64.4068		j107	76.0274		mec-3p	50.495		tax-4p	35.8696		glr-1p	48.1481
	N2	68.0723		j107	81.2081		mec-3p	81.3187		tax-4p	69.4737		glr-1p	77.1242			N2	40.5797		j107	79.5918		mec-3p	32.6389		tax-4p	32.5926		glr-1p	53.4091
	N2	72.8395		j107	86.5079		mec-3p	76.9231		tax-4p	69.9422		glr-1p	74.8603			N2	55.2941		j107	88.1188		mec-3p	26.9565		tax-4p	20.2899		glr-1p	60.7843
	N2	74.1935		j107	79.4872		mec-3p	86.7347		tax-4p	60.2484		glr-1p	68.5714			N2	55.5556		j107	87.1795		mec-3p	56.6667		tax-4p	34.4086		glr-1p	80.4348
	N2	68.6441		j107	75.4717					tax-4p	75.969		glr-1p	63.4921			N2	44.0299		j107	92.1053					tax-4p	29.3333		glr-1p	46.6019
	N2	60		j107	83.7719					tax-4p	66.8966		glr-1p	84.9462			N2	38.0208		j107	69.9346					tax-4p	33.75		glr-1p	60
	N2	69.0141		j107	73.2342					tax-4p	80.6452		glr-1p	75.6219			N2	27.619		j107	78.9474					tax-4p	10.7692		glr-1p	45.8333
	N2	64.6067		j107	82.4742					tax-4p	78.6325		glr-1p	79.5775			N2	47.3958		j107	84.3537					tax-4p	17.5926		glr-1p	64.6154
	N2	62.0155		j107	89.2857					tax-4p	70.3196		glr-1p	84.264			N2	11.1111		j107	84.3972					tax-4p	17.1569		glr-1p	79.8319
	N2	60.0746		j107	88.1081					tax-4p	69.0141		glr-1p	80.4054			N2	16.5094		j107	74.0458					tax-4p	20.8955		glr-1p	23.1343
	N2	70.9163		j107	83.1418					tax-4p	61.4035		glr-1p	80.7947			N2	30.2439		j107	73.7864					tax-4p	24.4681		glr-1p	31.6667
	N2	79.1667		j107	81.9905					tax-4p	70.7317		glr-1p	77.7778			N2	45.3782		j107	83.9161					tax-4p	31.0345		glr-1p	80
	N2	72.5806		j107	90.9091					tax-4p	74.4681						N2	52.4064		j107	58.6207					tax-4p	28.5714
	N2	62.6667		j107	93.7063					tax-4p	77.7108						N2	79.2453		j107	83.1683					tax-4p	31.068
	N2	57.6923		j107	75.817					tax-4p	79.2793						N2	23.7705		j107	83.2298					tax-4p	40
	N2	58.2278		j107	82.2581												N2	33.5766		j107	79.2208
	N2	69.7917		j107	81.0127												N2	49.5935		j107	76.5957
	N2	65.3659		j107	82.3755												N2	26.4706		j107	75.5725
	N2	65.8291		j107	84.1004												N2	23.0337		j107	73.743
	N2	72.2222		j107	86.0987												N2	31.5152		j107	81.0606
	N2	65.2941		j107	90.4215												N2	22.449		j107	68.125
	N2	79.3814		j107	87.3913												N2	21.7742		j107	70.2479
	N2	69.6035		j107	86.1111												N2	39.1813		j107	73.9583
	N2	68.3333		j107	85.0163												N2	36.2069		j107	77.5758
	N2	80.1047		j107	86.2637												N2	20.979		j107	67.7824
	N2	79.646		j107	80.4178												N2	33.3333		j107	71.2281
	N2	85.5263		j107	82.7309												N2	29.3103		j107	64.3312
	N2	73.3607		j107	79.1367												N2	41.9192		j107	71.3004
	N2	72.6027		j107	84.0456												N2	45.0777		j107	50.6711
	N2	73.7589		j107	80.3448												N2	26.4045		j107	75.9358
	N2	79.5918		j107	87.9121												N2	24.7423		j107	67.7165
	N2	82.8877		j107	90.5405												N2	32.9341		j107	68.75
	N2	64.2586		j107	90.6367												N2	19.8925		j107	54.661
	N2	70.5128		j107	86.0215												N2	21.6667		j107	57.3529
	N2	84.7458		j107	80.7175												N2	30.0699		j107	70.4698
	N2	80.4511		j107	82.1229												N2	32.4138		j107	69.6
	N2	74.7475		j107	84.3023												N2	25.8824		j107	68.1034
	N2	59.0361		j107	87.7358												N2	32.1429		j107	73.494
	N2	64.7059		j107	84.375												N2	20.5607		j107	68.2759
	N2	64.6617		j107	82.2368												N2	46.2264		j107	76.4045
	N2	79.3814		j107	91.3043												N2	33.8235		j107	78.6667
	N2	75.2688		j107	89.4737												N2	29.3478		j107	66.9643
	N2	81.6		j107	88.5246												N2	38.1443		j107	66.6667
	N2	72.3077		j107	85.6115												N2	38.7931		j107	73.2283
	N2	67.0588		j107	81.9876												N2	31.3131		j107	69.0476
	N2	60.4396		j107	86.2069												N2	34.3434		j107	78.8136
	N2	68.8259		j107	76.7273												N2	35.7664		j107	72.1893
	N2	84.2767		j107	88.3117												N2	43.4783		j107	70.1835
	N2	80.5556		j107	80.8036												N2	42.5676		j107	74.1722
	N2	72.0721		j107	80												N2	42.1053		j107	68.9655
	N2	76.5957		j107	80.4545												N2	40.4412		j107	65.4971
	N2	70		j107	94.6903												N2	47.7124		j107	76.6355
	N2	73.8854		j107	79.078												N2	30.0699		j107	81.1828
	N2	74.6154		j107	79.4393												N2	22.5564		j107	72.8395
	N2	78.2258		j107	71.8033												N2	43.7126		j107	85.6209
	N2	77.439		j107	70.1613												N2	32.9787		j107	66.6667
	N2	70.4663		j107	81.8462												N2	35.1064		j107	69.403
	N2	81.1881		j107	86.9955												N2	41.2429		j107	68.8976
	N2	76.1468		j107	77.6667												N2	29.0323		j107	64.9007
	N2	68.3824		j107	80.2432												N2	12.5		j107	71.0744
	N2	83.1731		j107	84.3373												N2	28.8591		j107	70.1493
	N2	80.8		j107	86.1538												N2	23.9669		j107	71.0145
	N2	80.9816		j107	82												N2	23.5294		j107	56.6845
	N2	74.3802		j107	76.9231												N2	22.6519		j107	58.3815
	N2	70.3911		j107	81.571												N2	35.2273		j107	60
	N2	75.4545		j107	84.0796												N2	19.8925		j107	61.5
	N2	81.6092		j107	81.5789												N2	31.2217		j107	68.3333
	N2	65.0407		j107	83.2143												N2	21.7949		j107	53.11
	N2	73.5537		j107	89.2019												N2	20.6349		j107	49.8113
	N2	51.2658															N2	38.2883

## Sheet: Figure 5b
pot-hoc tests					p <.001			p= 0.002			p <.001			p <.001			p <.001							p <.001			p <.001			p <.001			p <.001			p <.001
replicates		n=76			n=75			n=16			n=45			n=21			n=23				n=76			n=75			n=16			n=45			n=21			n=23
time		T0			T0			T0			T0			T0			T0				T60			T60			T60			T60			T60			T60
	N2	54.0541		j107	82.381		lgc-39p	93.4783		cex-1p	72.7273		nmr-1p	69.697		tdc-1p	76.6667			N2	12.963		j107	82.6923		lgc-39p	82.9787		cex-1p	81.6327		nmr-1p	53.5211		tdc-1p	55.9055
	N2	68.8742		j107	77.8894		lgc-39p	75.5682		cex-1p	69.5652		nmr-1p	70.9459		tdc-1p	68.7075			N2	27.2189		j107	80.2632		lgc-39p	35.0746		cex-1p	66.1017		nmr-1p	72.2467		tdc-1p	79.1667
	N2	52		j107	77.3723		lgc-39p	66.6667		cex-1p	72.381		nmr-1p	85.5422		tdc-1p	82.4675			N2	37.5691		j107	79.8507		lgc-39p	37.0968		cex-1p	84.8		nmr-1p	63.9344		tdc-1p	73.7589
	N2	71.6216		j107	76.7442		lgc-39p	76.9231		cex-1p	82.5581		nmr-1p	85.3211		tdc-1p	75.1724			N2	61.3636		j107	81.6176		lgc-39p	69.8276		cex-1p	75.2809		nmr-1p	72.7273		tdc-1p	58.3942
	N2	73.4513		j107	85.3107		lgc-39p	74.7253		cex-1p	82.3529		nmr-1p	78.5714		tdc-1p	86.3309			N2	20.8589		j107	85.1064		lgc-39p	26.9841		cex-1p	65.2174		nmr-1p	79.7468		tdc-1p	68.8889
	N2	74.8538		j107	87.931		lgc-39p	84.1121		cex-1p	71		nmr-1p	83.0769		tdc-1p	91.25			N2	30.1676		j107	84.4444		lgc-39p	16.4384		cex-1p	80.4348		nmr-1p	71.7391		tdc-1p	38.6364
	N2	76.0234		j107	74.7573		lgc-39p	72.4771		cex-1p	85.7143		nmr-1p	75.7143		tdc-1p	88.4211			N2	64.4068		j107	76.0274		lgc-39p	46.5909		cex-1p	37.6238		nmr-1p	55.4348		tdc-1p	65.0407
	N2	68.0723		j107	81.2081		lgc-39p	70.6522		cex-1p	74.7899		nmr-1p	84.7458		tdc-1p	84.2105			N2	40.5797		j107	79.5918		lgc-39p	31.0811		cex-1p	61.6438		nmr-1p	68.8889		tdc-1p	51.7857
	N2	72.8395		j107	86.5079		lgc-39p	64		cex-1p	81.1321		nmr-1p	84.2105		tdc-1p	92.3077			N2	55.2941		j107	88.1188		lgc-39p	38.3333		cex-1p	78.75		nmr-1p	31.1377		tdc-1p	45.7944
	N2	74.1935		j107	79.4872		lgc-39p	75		cex-1p	60.8392		nmr-1p	79.1667		tdc-1p	82.069			N2	55.5556		j107	87.1795		lgc-39p	75.8621		cex-1p	46.6667		nmr-1p	43.3824		tdc-1p	62.1622
	N2	68.6441		j107	75.4717		lgc-39p	78.5235		cex-1p	80.5195		nmr-1p	80.2326		tdc-1p	93.0693			N2	44.0299		j107	92.1053		lgc-39p	60.9756		cex-1p	60		nmr-1p	74.6575		tdc-1p	77.7778
	N2	60		j107	83.7719		lgc-39p	81.6794		cex-1p	78.2258		nmr-1p	82.1839		tdc-1p	85.5856			N2	38.0208		j107	69.9346		lgc-39p	31.3725		cex-1p	79.3103		nmr-1p	43.617		tdc-1p	74.3902
	N2	69.0141		j107	73.2342		lgc-39p	84.6154		cex-1p	71.1656		nmr-1p	88		tdc-1p	76.3889			N2	27.619		j107	78.9474		lgc-39p	49.3976		cex-1p	50.7463		nmr-1p	21.0526		tdc-1p	79.0698
	N2	64.6067		j107	82.4742		lgc-39p	77.4194		cex-1p	79.3548		nmr-1p	78.125		tdc-1p	75			N2	47.3958		j107	84.3537		lgc-39p	36.6667		cex-1p	64.8649		nmr-1p	49.4253		tdc-1p	58.6667
	N2	62.0155		j107	89.2857		lgc-39p	89.8305		cex-1p	71.4286		nmr-1p	81.8182		tdc-1p	86.6279			N2	11.1111		j107	84.3972		lgc-39p	51.4286		cex-1p	74.1071		nmr-1p	46.1538		tdc-1p	58.6022
	N2	60.0746		j107	88.1081		lgc-39p	94.8718		cex-1p	81.5287		nmr-1p	79.1667		tdc-1p	84.2975			N2	16.5094		j107	74.0458		lgc-39p	67.3077		cex-1p	47.8788		nmr-1p	32.2148		tdc-1p	63.1579
	N2	70.9163		j107	83.1418					cex-1p	75		nmr-1p	80.625		tdc-1p	78.2609			N2	30.2439		j107	73.7864					cex-1p	57.4359		nmr-1p	33.5616		tdc-1p	61.1111
	N2	79.1667		j107	81.9905					cex-1p	80.4511		nmr-1p	70.4348		tdc-1p	78.6667			N2	45.3782		j107	83.9161					cex-1p	79.1946		nmr-1p	35.9281		tdc-1p	56.6265
	N2	72.5806		j107	90.9091					cex-1p	62.6126		nmr-1p	78.0488		tdc-1p	78.4689			N2	52.4064		j107	58.6207					cex-1p	56.4444		nmr-1p	38.0488		tdc-1p	59.6491
	N2	62.6667		j107	93.7063					cex-1p	73.1225		nmr-1p	82.8025		tdc-1p	83.7398			N2	79.2453		j107	83.1683					cex-1p	75.4286		nmr-1p	58.871		tdc-1p	83.6879
	N2	57.6923		j107	75.817					cex-1p	68.5484		nmr-1p	74.8299		tdc-1p	90.8257			N2	23.7705		j107	83.2298					cex-1p	81.9742		nmr-1p	51.2346		tdc-1p	49.6241
	N2	58.2278		j107	82.2581					cex-1p	73.0337					tdc-1p	74.4186			N2	33.5766		j107	79.2208					cex-1p	53.5135					tdc-1p	58.1395
	N2	69.7917		j107	81.0127					cex-1p	81.7734					tdc-1p	82.1656			N2	49.5935		j107	76.5957					cex-1p	51.7045					tdc-1p	85.3147
	N2	65.3659		j107	82.3755					cex-1p	75.1174									N2	26.4706		j107	75.5725					cex-1p	60.4061
	N2	65.8291		j107	84.1004					cex-1p	76.5957									N2	23.0337		j107	73.743					cex-1p	50.2924
	N2	72.2222		j107	86.0987					cex-1p	82.6087									N2	31.5152		j107	81.0606					cex-1p	56.8807
	N2	65.2941		j107	90.4215					cex-1p	77.4194									N2	22.449		j107	68.125					cex-1p	75.969
	N2	79.3814		j107	87.3913					cex-1p	80.5263									N2	21.7742		j107	70.2479					cex-1p	56.3218
	N2	69.6035		j107	86.1111					cex-1p	79.1411									N2	39.1813		j107	73.9583					cex-1p	53.8462
	N2	68.3333		j107	85.0163					cex-1p	68.6869									N2	36.2069		j107	77.5758					cex-1p	65.6904
	N2	80.1047		j107	86.2637					cex-1p	82.1839									N2	20.979		j107	67.7824					cex-1p	53.3708
	N2	79.646		j107	80.4178					cex-1p	77.1429									N2	33.3333		j107	71.2281					cex-1p	58.9552
	N2	85.5263		j107	82.7309					cex-1p	79.6992									N2	29.3103		j107	64.3312					cex-1p	53.7234
	N2	73.3607		j107	79.1367					cex-1p	79.1045									N2	41.9192		j107	71.3004					cex-1p	43.6242
	N2	72.6027		j107	84.0456					cex-1p	86.014									N2	45.0777		j107	50.6711					cex-1p	62.2047
	N2	73.7589		j107	80.3448					cex-1p	79.8387									N2	26.4045		j107	75.9358					cex-1p	60.7843
	N2	79.5918		j107	87.9121					cex-1p	79.1367									N2	24.7423		j107	67.7165					cex-1p	45.0382
	N2	82.8877		j107	90.5405					cex-1p	84.9206									N2	32.9341		j107	68.75					cex-1p	45.4545
	N2	64.2586		j107	90.6367					cex-1p	85.4701									N2	19.8925		j107	54.661					cex-1p	70
	N2	70.5128		j107	86.0215					cex-1p	71.4286									N2	21.6667		j107	57.3529					cex-1p	43.4783
	N2	84.7458		j107	80.7175					cex-1p	70.7317									N2	30.0699		j107	70.4698					cex-1p	58.2278
	N2	80.4511		j107	82.1229					cex-1p	75.2336									N2	32.4138		j107	69.6					cex-1p	59.4444
	N2	74.7475		j107	84.3023					cex-1p	67.3077									N2	25.8824		j107	68.1034					cex-1p	62.069
	N2	59.0361		j107	87.7358					cex-1p	79.4521									N2	32.1429		j107	73.494					cex-1p	65.8537
	N2	64.7059		j107	84.375					cex-1p	78.6585									N2	20.5607		j107	68.2759					cex-1p	63.1579
	N2	64.6617		j107	82.2368															N2	46.2264		j107	76.4045
	N2	79.3814		j107	91.3043															N2	33.8235		j107	78.6667
	N2	75.2688		j107	89.4737															N2	29.3478		j107	66.9643
	N2	81.6		j107	88.5246															N2	38.1443		j107	66.6667
	N2	72.3077		j107	85.6115															N2	38.7931		j107	73.2283
	N2	67.0588		j107	81.9876															N2	31.3131		j107	69.0476
	N2	60.4396		j107	86.2069															N2	34.3434		j107	78.8136
	N2	68.8259		j107	76.7273															N2	35.7664		j107	72.1893
	N2	84.2767		j107	88.3117															N2	43.4783		j107	70.1835
	N2	80.5556		j107	80.8036															N2	42.5676		j107	74.1722
	N2	72.0721		j107	80															N2	42.1053		j107	68.9655
	N2	76.5957		j107	80.4545															N2	40.4412		j107	65.4971
	N2	70		j107	94.6903															N2	47.7124		j107	76.6355
	N2	73.8854		j107	79.078															N2	30.0699		j107	81.1828
	N2	74.6154		j107	79.4393															N2	22.5564		j107	72.8395
	N2	78.2258		j107	71.8033															N2	43.7126		j107	85.6209
	N2	77.439		j107	70.1613															N2	32.9787		j107	66.6667
	N2	70.4663		j107	81.8462															N2	35.1064		j107	69.403
	N2	81.1881		j107	86.9955															N2	41.2429		j107	68.8976
	N2	76.1468		j107	77.6667															N2	29.0323		j107	64.9007
	N2	68.3824		j107	80.2432															N2	12.5		j107	71.0744
	N2	83.1731		j107	84.3373															N2	28.8591		j107	70.1493
	N2	80.8		j107	86.1538															N2	23.9669		j107	71.0145
	N2	80.9816		j107	82															N2	23.5294		j107	56.6845
	N2	74.3802		j107	76.9231															N2	22.6519		j107	58.3815
	N2	70.3911		j107	81.571															N2	35.2273		j107	60
	N2	75.4545		j107	84.0796															N2	19.8925		j107	61.5
	N2	81.6092		j107	81.5789															N2	31.2217		j107	68.3333
	N2	65.0407		j107	83.2143															N2	21.7949		j107	53.11
	N2	73.5537		j107	89.2019															N2	20.6349		j107	49.8113
	N2	51.2658																		N2	38.2883
